# Supplementary material
Source: PubMed Central journal article supplement (PMC7993099)

**Supplementary Table 1.** Response rate to second line treatment according to treatment arm for patients experiencing POD24

| n (%)                                  | Observation<br>N = 134 | Rituximab Maintenance<br>N = 72 | P <sup>¶</sup> |
|----------------------------------------|------------------------|---------------------------------|----------------|
| Number of patients with available data | n = 126                | n = 61                          |                |
| Complete response                      | 42 (33.3)              | 19 (31.1)                       | 0.029          |
| Unconfirmed complete response          | 29 (23.0)              | 5 (8.2)                         |                |
| Partial response                       | 25 (19.8)              | 15 (24.6)                       |                |
| Stable disease                         | 12 (9.5)               | 7 (11.4)                        |                |
| Progressive disease                    | 18 (14.3)              | 15 (24.6)                       |                |

\*24 months after registration (i.e. 18 months after randomization between rituximab maintenance or observation).

¶for CR/CRu versus PR/SD/PD (chi-square test)

**Supplementary Table 2.** Patient characteristics at trial inclusion (*i.e.* before induction treatment) according to treatment arm for patients experiencing POD24

|                                   | Maintenance arm   |                      | Early POD set | <i>P</i> |
|-----------------------------------|-------------------|----------------------|---------------|----------|
|                                   | Rituximab<br>N=72 | Observation<br>N=134 | N=206         |          |
| <b>Age groups at baseline</b>     |                   |                      |               |          |
| <= 60                             | 44 (61.1%)        | 90 (67.2%)           | 134 (65.0%)   | 0.258    |
| ]60;70]                           | 16 (22.2%)        | 32 (23.9%)           | 48 (23.3%)    |          |
| >70                               | 12 (16.7%)        | 12 (9.0%)            | 24 (11.7%)    |          |
| <b>Gender</b>                     |                   |                      |               |          |
| Female                            | 31 (43.1%)        | 61 (45.5%)           | 92 (44.7%)    | 0.734    |
| Male                              | 41 (56.9%)        | 73 (54.5%)           | 114 (55.3%)   |          |
| <b>Ann Arbor Stage in group</b>   |                   |                      |               |          |
| I-II                              | 2 (2.8%)          | 8 (6.0%)             | 10 (4.9%)     | 0.499    |
| III-IV                            | 70 (97.2%)        | 126 (94.0%)          | 196 (95.1%)   |          |
| <b>Bone marrow involvement</b>    |                   |                      |               |          |
| Not involved                      | 29 (40.3%)        | 39 (29.1%)           | 68 (33.0%)    | 0.138    |
| Involved                          | 43 (59.7%)        | 91 (67.9%)           | 134 (65.0%)   |          |
| Unspecified                       | 0 (0.0%)          | 3 (2.2%)             | 3 (1.5%)      |          |
| Not done                          | 0 (0.0%)          | 1 (0.7%)             | 1 (0.5%)      |          |
| <b>B symptoms</b>                 |                   |                      |               |          |
| No                                | 41 (56.9%)        | 87 (64.9%)           | 128 (62.1%)   | 0.260    |
| Yes                               | 31 (43.1%)        | 47 (35.1%)           | 78 (37.9%)    |          |
| <b>ECOG</b>                       |                   |                      |               |          |
| 0                                 | 36 (50.0%)        | 79 (59.0%)           | 115 (55.8%)   | 0.419    |
| 1                                 | 31 (43.1%)        | 46 (34.3%)           | 77 (37.4%)    |          |
| 2                                 | 5 (6.9%)          | 9 (6.7%)             | 14 (6.8%)     |          |
| <b>LDH groups</b>                 |                   |                      |               |          |
| =<Upper Normal limit              | 37 (51.4%)        | 84 (63.2%)           | 121 (59.0%)   | 0.102    |
| >Upper Normal limit               | 35 (48.6%)        | 49 (36.8%)           | 84 (41.0%)    |          |
| Missing                           | 0                 | 1                    | 1             |          |
| <b>Hemoglobin groups</b>          |                   |                      |               |          |
| <12 g/dL                          | 23 (31.9%)        | 34 (25.4%)           | 57 (27.7%)    | 0.315    |
| >=12 g/dL                         | 49 (68.1%)        | 100 (74.6%)          | 149 (72.3%)   |          |
| <b>Beta2 microglobulin groups</b> |                   |                      |               |          |
| <3 mg/L                           | 34 (50.0%)        | 76 (62.3%)           | 110 (57.9%)   | 0.100    |
| >=3 mg/L                          | 34 (50.0%)        | 46 (37.7%)           | 80 (42.1%)    |          |
| Missing                           | 4                 | 12                   | 16            |          |
| <b>Number of nodal areas</b>      |                   |                      |               |          |
| =<4                               | 13 (18.1%)        | 35 (26.1%)           | 48 (23.3%)    | 0.192    |
| >4                                | 59 (81.9%)        | 99 (73.9%)           | 158 (76.7%)   |          |
| <b>FLIPI group</b>                |                   |                      |               |          |
| 0-2                               | 28 (38.9%)        | 70 (52.2%)           | 98 (47.6%)    | 0.067    |
| 3-5                               | 44 (61.1%)        | 64 (47.8%)           | 108 (52.4%)   |          |

**Supplementary Figure 1. OS from risk-defining event by treatment arm**

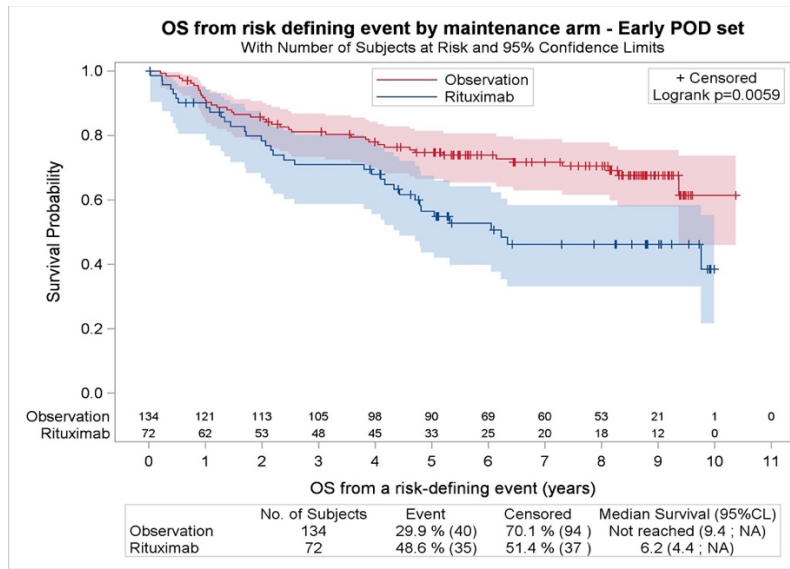

**Supplementary Figure 2.** Cumulative incidence of histologic transformation (considering other events as competing risks) (reproduced from the supplementary material of reference 8).

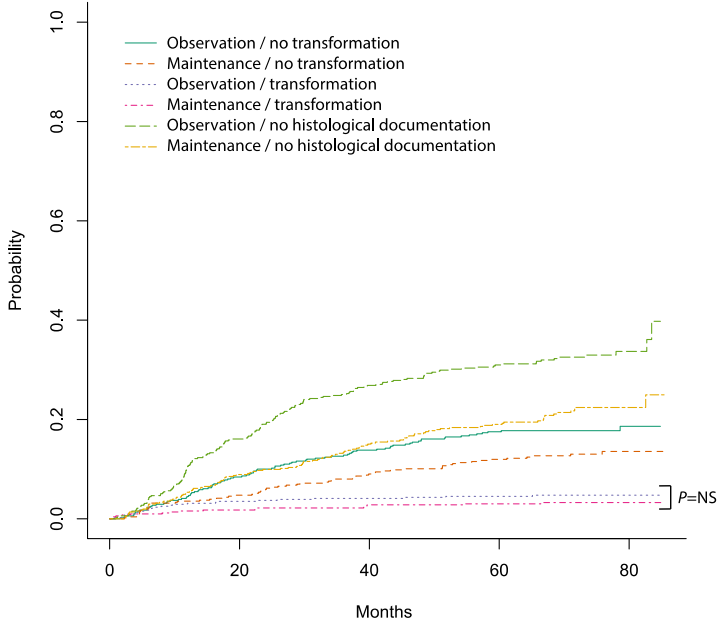

**Supplementary Figure 3.** OS according to POD24 status by treatment arm in the sensitivity analysis where the 140 patients who did not undergo randomization in the PRIMA study were randomly assigned to a pseudo-arm at inclusion (70 in the maintenance arm and 70 in the observation arm; i.e. 33 in the “early POD & observation”, 33 in the “early POD and rituximab”, 37 in “the no early POD & observation” and 37 in the “no early POD & rituximab” groups respectively)

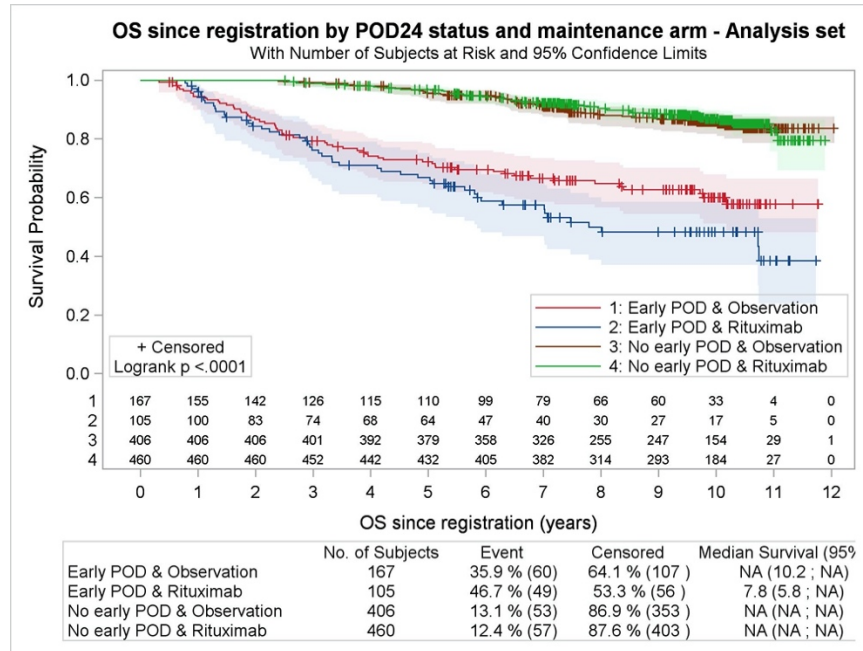

**Supplementary Figure 4.** OS for patients experiencing POD24 according to treatment arm considering a 4-year median follow-up duration from registration in the PRIMA trial

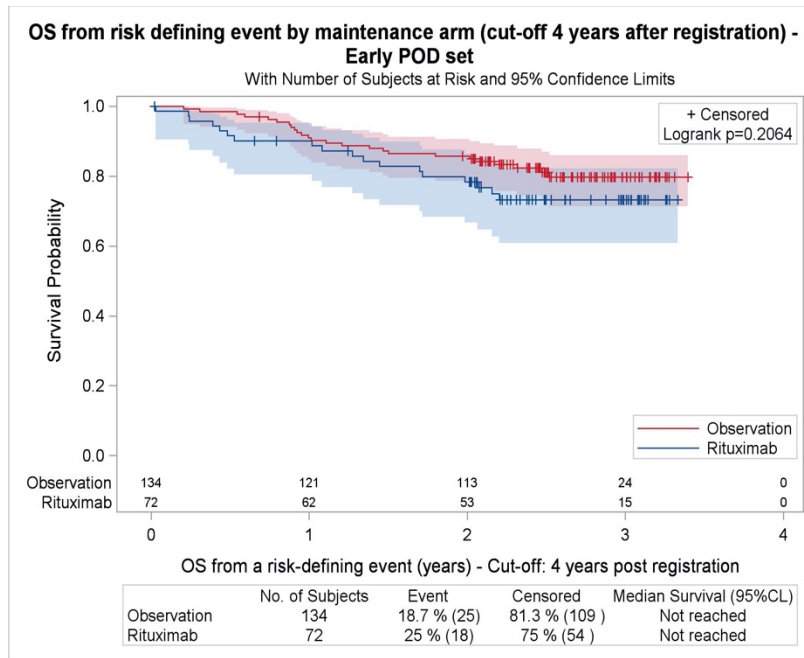

Supplement: advancesADV2020003797-suppl1.pdf [file advancesADV2020003797-suppl1.pdf]
